# Supplementary material for: Utilizing MiSeq Sequencing to Detect Circulating microRNAs in Plasma for Improved Lung Cancer Diagnosis
Source: MDPI journal article supplement (doi:10.3390/ijms241210277), 2023-06-17
Supplement: s1 [file s1]

## Supplementary files

**Supplemental table S1:** Quality control summary- Reads quality of all the samples

| Sample name            | Reads     | UMI reads | Avg Q score, UMI reads | UMI reads annotated | UMI reads annotated with miRBase |
|------------------------|-----------|-----------|------------------------|---------------------|----------------------------------|
| PlasmaVA686B_S1        | 5,260,354 | 807,361   | 55.17                  | 463,565 (57.43%)    | 443,073 (54.89%)                 |
| PlasmaUM713B_S2        | 6,656,545 | 2,243,882 | 41.36                  | 1,118,115 (49.83%)  | 1,030,540 (45.93%)               |
| PlasmaVA516SCC_S2      | 5,755,835 | 2,047,557 | 44.96                  | 1,067,977 (52.16%)  | 1,014,378 (49.55%)               |
| UM773AC_S2             | 4,558,980 | 894,947   | 51.52                  | 630,609 (70.48%)    | 598,516 (66.89%)                 |
| UM778AC-IDP07_S3       | 8,154,563 | 939,008   | 52.61                  | 396,702 (42.25%)    | 387,834 (41.31%)                 |
| PlasmaVA189AC_S1       | 6,389,037 | 1,209,276 | 54.57                  | 967,397 (80.01%)    | 943,687 (78.04%)                 |
| UMs753SCC-IDP3_S1      | 5,208,597 | 1,672,091 | 45.42                  | 819,905 (49.04%)    | 795,055 (47.56%)                 |
| UM754mAC-IDP4_S2       | 4,384,680 | 1,003,951 | 48.19                  | 604,062 (60.17%)    | 591,766 (58.95%)                 |
| PlasmaUM711SCC-IDP2_S1 | 6,010,282 | 909,432   | 54.91                  | 661,426 (72.73%)    | 603,620 (66.38%)                 |
| PlasmaUM736AC_S2       | 5,386,123 | 1,578,289 | 44.85                  | 1,148,819 (72.80%)  | 949,779 (60.19%)                 |
| PlasmaUM692B_S1        | 5,954,668 | 2,428,421 | 46.17                  | 2,075,713 (85.50%)  | 1,895,158 (78.06%)               |
| PlasmaUM636SCC_S4      | 5,741,784 | 3,274,957 | 41.27                  | 2,870,619 (87.69%)  | 2,630,572 (80.36%)               |
| PlasmaUM705mAC_S3      | 6,474,633 | 1,080,689 | 51.9                   | 679,258 (62.86%)    | 629,270 (58.24%)                 |
| PlasmaUM764B-IDP10_S3  | 5,267,368 | 623,563   | 56.45                  | 477,496 (76.58%)    | 467,585 (74.99%)                 |
| PlasmaUM652B_S3        | 4,548,156 | 434,769   | 57.39                  | 205,973 (47.38%)    | 183,607 (42.23%)                 |
| PlasmaUM686AC_S4       | 5,853,101 | 2,500,558 | 44.02                  | 2,218,644 (88.75%)  | 2,082,164 (83.29%)               |
| UM701-2AC-IDP7_S1      | 8,476,726 | 818,979   | 55.8                   | 551,080 (67.29%)    | 538,818 (65.80%)                 |
| PlasmaUM735AC_S3       | 6,091,752 | 2,924,606 | 40.99                  | 2,230,443 (76.27%)  | 1,969,870 (67.36%)               |
| PlasmaUM656B_S4        | 6,790,054 | 856,474   | 56.77                  | 397,266 (46.39%)    | 379,001 (44.25%)                 |
| PlasmaUM785B-IDP11_S4  | 5,807,056 | 582,308   | 56.86                  | 454,804 (78.11%)    | 435,954 (74.87%)                 |
| PlasmaUM547B_S2        | 4,597,134 | 1,093,309 | 48.82                  | 209,372 (19.15%)    | 195,717 (17.90%)                 |
| UM726B_S2              | 7,589,584 | 858,280   | 54.42                  | 455,967 (53.13%)    | 430,805 (50.20%)                 |
| PlasmaUM662B_S4        | 8,262,025 | 724,116   | 57.78                  | 387,393 (53.50%)    | 373,376 (51.56%)                 |
| UM774B_S3              | 6,099,959 | 902,232   | 53.13                  | 627,317 (69.54%)    | 611,067 (67.74%)                 |
| PlasmaUM635SCC_S3      | 6,351,655 | 1,886,986 | 44.28                  | 1,445,462 (76.62%)  | 1,333,649 (70.70%)               |
| UMs709AC-IDP10_S1      | 6,966,012 | 686,093   | 57.27                  | 338,827 (49.39%)    | 320,520 (46.72%)                 |
| PlasmaUM693B_S1        | 5,465,967 | 2,781,213 | 43.3                   | 2,437,623 (87.69%)  | 2,085,236 (75.02%)               |
| VA700B_S1              | 7,013,968 | 1,377,193 | 49.82                  | 844,274 (61.31%)    | 731,733 (53.14%)                 |
| PlasmaUM690B_S2        | 6,596,070 | 1,564,653 | 52.06                  | 1,220,428 (78.01%)  | 1,158,474 (74.05%)               |
| PlasmaUM645B_S1        | 4,627,280 | 1,791,823 | 44.73                  | 1,456,638 (81.31%)  | 1,283,514 (71.64%)               |
| PlasmaUM748AC_S4       | 5,599,128 | 2,301,565 | 43.85                  | 1,982,709 (86.18%)  | 1,855,694 (80.66%)               |
| UM680SCC-IDP01_S1      | 7,132,387 | 1,416,383 | 47.78                  | 805,107 (56.85%)    | 766,096 (54.09%)                 |
| UM751SCC-IDP09_S3      | 6,455,923 | 1,433,551 | 50.1                   | 903,036 (63%)       | 868,586 (60.60%)                 |
| PlasmaUM727B_S2        | 5,698,657 | 2,847,524 | 42.54                  | 2,391,856 (84.03%)  | 1,985,762 (69.76%)               |
| PlasmaUM715B-IDP4_S2   | 6,598,054 | 2,130,191 | 51.41                  | 1,771,627 (83.18%)  | 1,579,302 (74.15%)               |

|                        |           |           |       |                    |                    |
|------------------------|-----------|-----------|-------|--------------------|--------------------|
| PlasmaUM719B_S2        | 5,475,318 | 2,428,321 | 43.91 | 2,019,080 (83.18%) | 1,678,275 (69.14%) |
| PlasmaUM777B_S4        | 4,820,785 | 1,051,590 | 52.14 | 691,396 (65.76%)   | 681,075 (64.78%)   |
| PlasmaUM708AC_S3       | 7,048,518 | 2,642,830 | 46.11 | 2,223,966 (84.21%) | 1,655,873 (62.70%) |
| UMs757B-IDP5_S2        | 6,547,329 | 978,466   | 56.37 | 649,742 (66.41%)   | 618,494 (63.22%)   |
| PlasmaUM717AC_S1       | 7,673,975 | 1,770,220 | 48.79 | 1,107,019 (62.55%) | 1,083,231 (61.20%) |
| PlasmaUM633B_S3        | 8,164,992 | 882,020   | 57.3  | 458,808 (52.02%)   | 444,119 (50.36%)   |
| PlasmaUM786SCC_S5      | 5,551,233 | 616,112   | 56.27 | 396,702 (64.40%)   | 386,713 (62.77%)   |
| PlasmaUM674AC_S1       | 5,898,851 | 667,442   | 56.09 | 478,917 (71.76%)   | 466,721 (69.93%)   |
| UM759B-IDP12_S2        | 7,699,216 | 2,061,477 | 48.06 | 1,421,543 (68.97%) | 1,390,874 (67.48%) |
| PlasmaUM658SCC_S3      | 6,841,276 | 5,144,647 | 38.28 | 4,713,021 (91.66%) | 4,145,097 (80.61%) |
| UM741B_S4              | 8,038,925 | 1,124,084 | 53.4  | 688,693 (61.27%)   | 656,539 (58.41%)   |
| PlasmaUM676B_S3        | 4,295,469 | 678,167   | 55.88 | 469,791 (69.28%)   | 462,424 (68.20%)   |
| PlasmaUM642SCC_S4      | 5,977,042 | 2,433,505 | 42.92 | 1,952,169 (80.24%) | 1,638,716 (67.36%) |
| UMs766AC-IDP8_S3       | 6,739,436 | 941,325   | 57.1  | 620,515 (65.92%)   | 595,086 (63.22%)   |
| UMs761SCC-IDP7_S3      | 6,261,816 | 1,445,795 | 53.75 | 932,185 (64.49%)   | 822,003 (56.87%)   |
| PlasmaUM667SCC_S4      | 6,040,219 | 2,709,822 | 41.51 | 2,108,957 (77.86%) | 1,828,245 (67.50%) |
| PlasmaUM373B_S4        | 6,015,391 | 931,031   | 54.72 | 677,735 (72.80%)   | 664,368 (71.36%)   |
| PlasmaUM696SCC-IDP1_S1 | 6,088,704 | 1,006,620 | 54.43 | 773,325 (76.84%)   | 710,985 (70.64%)   |
| UM760B-IDP02_S1        | 7,872,949 | 2,614,748 | 48    | 2,122,653 (81.20%) | 2,071,001 (79.23%) |
| PlasmaUM385B_S4        | 5,643,075 | 1,140,624 | 53.45 | 920,039 (80.67%)   | 891,634 (78.18%)   |
| PlasmaUM641B_S1        | 5,754,477 | 3,017,242 | 41.88 | 2,739,038 (90.82%) | 2,593,720 (86.01%) |
| PlasmaUM720SCC_S3      | 5,685,516 | 1,930,624 | 47.54 | 1,590,274 (82.39%) | 1,290,894 (66.88%) |
| PlasmaUM730AC_S2       | 5,825,552 | 3,462,730 | 39.48 | 3,004,193 (86.79%) | 2,628,896 (75.95%) |
| PlasmaUM737AC_S2       | 6,056,096 | 3,187,916 | 39.98 | 2,553,435 (80.12%) | 2,410,971 (75.65%) |
| PlasmaUM734SCC-IDP7_S4 | 5,445,338 | 652,449   | 55.16 | 430,365 (65.97%)   | 409,768 (62.81%)   |
| PlasmaUM644B_S1        | 5,505,061 | 3,626,951 | 40.4  | 3,264,500 (90.05%) | 2,881,601 (79.49%) |
| PlasmaUM745SCC-IDP9_S2 | 6,090,589 | 747,149   | 55.42 | 506,134 (67.75%)   | 490,949 (65.72%)   |
| PlasmaUM728SCC-IDP6_S3 | 6,014,862 | 2,326,986 | 49.67 | 2,077,180 (89.28%) | 1,976,822 (84.97%) |
| UM740B_S3              | 8,653,435 | 962,727   | 55.3  | 547,615 (56.89%)   | 536,532 (55.73%)   |
| PlasmaUM742B_S2        | 5,791,170 | 3,242,083 | 41.03 | 2,890,938 (89.21%) | 2,488,589 (76.79%) |
| PlasmaVA525SCC_S4      | 6,291,716 | 736,579   | 56.35 | 223,683 (30.37%)   | 215,010 (29.19%)   |
| PlasmaVA530SCC_S1      | 6,160,632 | 761,928   | 55.91 | 217,405 (28.54%)   | 210,569 (27.64%)   |
| PlasmaUM659AC_S3       | 5,943,502 | 2,954,833 | 43.24 | 2,694,674 (91.24%) | 2,522,405 (85.40%) |
| PlasmaVA473SCC_S1      | 6,226,269 | 1,815,741 | 44.64 | 827,024 (45.55%)   | 762,215 (41.98%)   |
| PlasmaUM661AC_S4       | 5,306,869 | 1,147,112 | 48.53 | 780,368 (68.03%)   | 653,157 (56.94%)   |
| PlasmaUM767B_S2        | 6,407,293 | 433,067   | 57.06 | 217,837 (50.30%)   | 212,486 (49.07%)   |

**Supplemental table S2:** Creation of UMI reads from raw reads

| Sample name            | Input reads | Avg Q score, input reads | Discarded reads | UMI groups | Merged UMI groups | Avg Q score, UMI reads | Avg reads per UMI | UMIs with less than 9 reads |
|------------------------|-------------|--------------------------|-----------------|------------|-------------------|------------------------|-------------------|-----------------------------|
| PlasmaVA686B_S1        | 5,260,354   | 36.45                    | 2,279,350       | 956,134    | 807,361           | 55.17                  | 3                 | 96.62%                      |
| PlasmaUM713B_S2        | 6,656,545   | 36.49                    | 3,767,799       | 2,309,253  | 2,243,882         | 41.36                  | 1                 | 100.00%                     |
| PlasmaVA516SCC_S2      | 5,755,835   | 36.53                    | 2,598,540       | 2,124,718  | 2,047,557         | 44.96                  | 1                 | 100.00%                     |
| UM773AC_S2             | 4,558,980   | 36.37                    | 2,417,462       | 965,005    | 894,947           | 51.52                  | 2                 | 99.86%                      |
| UM778AC-IDP07_S3       | 8,154,563   | 35.75                    | 5,449,249       | 1,066,746  | 939,008           | 52.61                  | 2                 | 99.25%                      |
| PlasmaVA189AC_S1       | 6,389,037   | 36.52                    | 2,348,806       | 1,361,519  | 1,209,276         | 54.57                  | 3                 | 98.18%                      |
| UMs753SCC-IDP3_S1      | 5,208,597   | 36.3                     | 2,481,300       | 1,785,357  | 1,672,091         | 45.42                  | 1                 | 99.98%                      |
| UM754mAC-IDP4_S2       | 4,384,680   | 36.47                    | 2,506,577       | 1,065,447  | 1,003,951         | 48.19                  | 1                 | 99.98%                      |
| PlasmaUM711SCC-IDP2_S1 | 6,010,282   | 36.35                    | 2,734,678       | 1,034,103  | 909,432           | 54.91                  | 3                 | 96.87%                      |
| PlasmaUM736AC_S2       | 5,386,123   | 36.44                    | 2,936,797       | 1,663,968  | 1,578,289         | 44.85                  | 1                 | 99.99%                      |
| PlasmaUM692B_S1        | 5,954,668   | 36.48                    | 1,846,070       | 2,620,865  | 2,428,421         | 46.17                  | 1                 | 99.99%                      |
| PlasmaUM636SCC_S4      | 5,741,784   | 36.44                    | 1,300,709       | 3,636,519  | 3,274,957         | 41.27                  | 1                 | 99.92%                      |
| PlasmaUM705mAC_S3      | 6,474,633   | 36.46                    | 3,756,693       | 1,210,453  | 1,080,689         | 51.9                   | 2                 | 99.77%                      |
| PlasmaUM764B-IDP10_S3  | 5,267,368   | 30.99                    | 2,205,674       | 816,248    | 623,563           | 56.45                  | 4                 | 87.44%                      |
| PlasmaUM652B_S3        | 4,548,156   | 36.36                    | 1,742,159       | 538,597    | 434,769           | 57.39                  | 6                 | 70.89%                      |
| PlasmaUM686AC_S4       | 5,853,101   | 36.41                    | 1,977,141       | 2,808,841  | 2,500,558         | 44.02                  | 1                 | 99.94%                      |
| UM701-2AC-IDP7_S1      | 8,476,726   | 36.06                    | 5,029,998       | 1,030,602  | 818,979           | 55.8                   | 4                 | 93.89%                      |
| PlasmaUM735AC_S3       | 6,091,752   | 36.54                    | 2,393,126       | 3,025,534  | 2,924,606         | 40.99                  | 1                 | 99.99%                      |
| PlasmaUM656B_S4        | 6,790,054   | 36.32                    | 2,939,052       | 1,022,860  | 856,474           | 56.77                  | 4                 | 93.03%                      |
| PlasmaUM785B-IDP11_S4  | 5,807,056   | 31.69                    | 2,304,948       | 789,884    | 582,308           | 56.86                  | 6                 | 75.14%                      |
| PlasmaUM547B_S2        | 4,597,134   | 36.4                     | 2,451,507       | 1,139,689  | 1,093,309         | 48.82                  | 1                 | 99.98%                      |
| UM726B_S2              | 7,589,584   | 35.95                    | 4,792,752       | 963,282    | 858,280           | 54.42                  | 3                 | 98.60%                      |
| PlasmaUM662B_S4        | 8,262,025   | 36.4                     | 3,209,251       | 902,888    | 724,116           | 57.78                  | 6                 | 65.72%                      |
| UM774B_S3              | 6,099,959   | 36.38                    | 3,646,389       | 997,020    | 902,232           | 53.13                  | 2                 | 99.62%                      |
| PlasmaUM635SCC_S3      | 6,351,655   | 36.43                    | 3,465,962       | 2,034,686  | 1,886,986         | 44.28                  | 1                 | 99.98%                      |
| UMs709AC-IDP10_S1      | 6,966,012   | 36.1                     | 2,735,535       | 850,662    | 686,093           | 57.27                  | 6                 | 74.67%                      |
| PlasmaUM693B_S1        | 5,465,967   | 36.53                    | 1,325,059       | 3,117,789  | 2,781,213         | 43.3                   | 1                 | 99.95%                      |
| VA700B_S1              | 7,013,968   | 35.93                    | 4,032,817       | 1,476,918  | 1,377,193         | 49.82                  | 2                 | 99.94%                      |
| PlasmaUM690B_S2        | 6,596,070   | 36.45                    | 2,615,344       | 1,828,850  | 1,564,653         | 52.06                  | 2                 | 99.68%                      |
| PlasmaUM645B_S1        | 4,627,280   | 36.46                    | 1,801,101       | 1,971,654  | 1,791,823         | 44.73                  | 1                 | 99.96%                      |
| PlasmaUM748AC_S4       | 5,599,128   | 36.52                    | 2,005,887       | 2,662,784  | 2,301,565         | 43.85                  | 1                 | 99.90%                      |
| UM680SCC-IDP01_S1      | 7,132,387   | 36.07                    | 4,457,117       | 1,513,119  | 1,416,383         | 47.78                  | 1                 | 99.98%                      |
| UM751SCC-IDP09_S3      | 6,455,923   | 36.05                    | 3,295,531       | 1,596,176  | 1,433,551         | 50.1                   | 2                 | 99.91%                      |
| PlasmaUM727B_S2        | 5,698,657   | 36.51                    | 1,681,951       | 3,100,812  | 2,847,524         | 42.54                  | 1                 | 99.97%                      |

|                        |           |       |           |           |           |       |   |         |
|------------------------|-----------|-------|-----------|-----------|-----------|-------|---|---------|
| PlasmaUM715B-IDP4_S2   | 6,598,054 | 36.36 | 1,491,833 | 2,403,215 | 2,130,191 | 51.41 | 2 | 99.81%  |
| PlasmaUM719B_S2        | 5,475,318 | 36.44 | 1,824,514 | 2,630,752 | 2,428,321 | 43.91 | 1 | 99.98%  |
| PlasmaUM777B_S4        | 4,820,785 | 36.45 | 2,135,736 | 1,216,969 | 1,051,590 | 52.14 | 2 | 99.69%  |
| PlasmaUM708AC_S3       | 7,048,518 | 36.45 | 2,574,094 | 2,894,797 | 2,642,830 | 46.11 | 1 | 99.98%  |
| UMs757B-IDP5_S2        | 6,547,329 | 36.37 | 2,321,795 | 1,184,745 | 978,466   | 56.37 | 4 | 93.43%  |
| PlasmaUM717AC_S1       | 7,673,975 | 35.18 | 3,776,345 | 2,082,612 | 1,770,220 | 48.79 | 2 | 99.85%  |
| PlasmaUM633B_S3        | 8,164,992 | 36.4  | 3,540,393 | 1,084,193 | 882,020   | 57.3  | 5 | 86.28%  |
| PlasmaUM786SCC_S5      | 5,551,233 | 36.44 | 2,767,034 | 743,039   | 616,112   | 56.27 | 4 | 91.15%  |
| PlasmaUM674AC_S1       | 5,898,851 | 36.45 | 3,079,502 | 808,219   | 667,442   | 56.09 | 4 | 94.05%  |
| UM759B-IDP12_S2        | 7,699,216 | 36.08 | 3,724,771 | 2,270,784 | 2,061,477 | 48.06 | 1 | 99.96%  |
| PlasmaUM658SCC_S3      | 6,841,276 | 36.51 | 1,068,864 | 5,336,122 | 5,144,647 | 38.28 | 1 | 99.98%  |
| UM741B_S4              | 8,038,925 | 35.93 | 4,774,214 | 1,258,105 | 1,124,084 | 53.4  | 2 | 99.36%  |
| PlasmaUM676B_S3        | 4,295,469 | 36.39 | 1,602,893 | 841,004   | 678,167   | 55.88 | 3 | 95.20%  |
| PlasmaUM642SCC_S4      | 5,977,042 | 36.47 | 2,486,809 | 2,636,792 | 2,433,505 | 42.92 | 1 | 99.97%  |
| UMs766AC-IDP8_S3       | 6,739,436 | 36.1  | 1,681,215 | 1,147,766 | 941,325   | 57.1  | 5 | 83.62%  |
| UMs761SCC-IDP7_S3      | 6,261,816 | 36.37 | 1,940,667 | 1,652,521 | 1,445,795 | 53.75 | 2 | 99.16%  |
| PlasmaUM667SCC_S4      | 6,040,219 | 36.46 | 2,500,493 | 2,813,770 | 2,709,822 | 41.51 | 1 | 99.99%  |
| PlasmaUM373B_S4        | 6,015,391 | 36.46 | 2,333,984 | 1,086,471 | 931,031   | 54.72 | 3 | 92.67%  |
| PlasmaUM696SCC-IDP1_S1 | 6,088,704 | 32.57 | 2,664,292 | 1,224,793 | 1,006,620 | 54.43 | 3 | 97.83%  |
| UM760B-IDP02_S1        | 7,872,949 | 35.76 | 2,514,728 | 3,165,780 | 2,614,748 | 48    | 2 | 99.79%  |
| PlasmaUM385B_S4        | 5,643,075 | 36.44 | 1,523,447 | 1,316,908 | 1,140,624 | 53.45 | 3 | 95.49%  |
| PlasmaUM641B_S1        | 5,754,477 | 36.42 | 1,448,161 | 3,458,536 | 3,017,242 | 41.88 | 1 | 99.88%  |
| PlasmaUM720SCC_S3      | 5,685,516 | 36.55 | 2,180,646 | 2,101,315 | 1,930,624 | 47.54 | 1 | 99.98%  |
| PlasmaUM730AC_S2       | 5,825,552 | 36.47 | 1,702,314 | 3,602,757 | 3,462,730 | 39.48 | 1 | 99.98%  |
| PlasmaUM737AC_S2       | 6,056,096 | 36.37 | 2,064,705 | 3,422,590 | 3,187,916 | 39.98 | 1 | 99.96%  |
| PlasmaUM734SCC-IDP7_S4 | 5,445,338 | 36.34 | 2,976,734 | 749,029   | 652,449   | 55.16 | 3 | 95.77%  |
| PlasmaUM644B_S1        | 5,505,061 | 36.48 | 970,062   | 3,812,966 | 3,626,951 | 40.4  | 1 | 99.99%  |
| PlasmaUM745SCC-IDP9_S2 | 6,090,589 | 31.88 | 3,151,428 | 925,645   | 747,149   | 55.42 | 3 | 95.11%  |
| PlasmaUM728SCC-IDP6_S3 | 6,014,862 | 36.36 | 1,062,915 | 2,734,097 | 2,326,986 | 49.67 | 2 | 99.85%  |
| UM740B_S3              | 8,653,435 | 35.93 | 5,161,326 | 1,108,504 | 962,727   | 55.3  | 3 | 97.51%  |
| PlasmaUM742B_S2        | 5,791,170 | 36.56 | 1,523,626 | 3,529,658 | 3,242,083 | 41.03 | 1 | 99.96%  |
| PlasmaVA525SCC_S4      | 6,291,716 | 36.45 | 2,909,851 | 892,188   | 736,579   | 56.35 | 4 | 91.18%  |
| PlasmaVA530SCC_S1      | 6,160,632 | 36.38 | 2,963,293 | 865,069   | 761,928   | 55.91 | 4 | 93.70%  |
| PlasmaUM659AC_S3       | 5,943,502 | 36.55 | 1,462,260 | 3,417,533 | 2,954,833 | 43.24 | 1 | 99.90%  |
| PlasmaVA473SCC_S1      | 6,226,269 | 36.55 | 3,480,724 | 1,871,387 | 1,815,741 | 44.64 | 1 | 100.00% |
| PlasmaUM661AC_S4       | 5,306,869 | 36.49 | 3,101,064 | 1,233,985 | 1,147,112 | 48.53 | 1 | 99.98%  |
| PlasmaUM767B_S2        | 6,407,293 | 36.45 | 3,779,346 | 521,144   | 433,067   | 57.06 | 6 | 75.24%  |

**Supplemental table S3: miRNA found in samples**

|                         | miRBase (Homo sapiens) |
|-------------------------|------------------------|
| Records in source       | 1,917                  |
| Records found in sample | -                      |
| PlasmaVA686B_S1         | 571 (29.79%)           |
| PlasmaUM713B_S2         | 753 (39.28%)           |
| PlasmaVA516SCC_S2       | 747 (38.97%)           |
| UM773AC_S2              | 706 (36.83%)           |
| UM778AC-IDP07_S3        | 532 (27.75%)           |
| PlasmaVA189AC_S1        | 738 (38.50%)           |
| UMs753SCC-IDP3_S1       | 719 (37.51%)           |
| UM754mAC-IDP4_S2        | 582 (30.36%)           |
| PlasmaUM711SCC-IDP2_S1  | 707 (36.88%)           |
| PlasmaUM736AC_S2        | 773 (40.32%)           |
| PlasmaUM692B_S1         | 893 (46.58%)           |
| PlasmaUM636SCC_S4       | 889 (46.37%)           |
| PlasmaUM705mAC_S3       | 606 (31.61%)           |
| PlasmaUM764B-IDP10_S3   | 536 (27.96%)           |
| PlasmaUM652B_S3         | 535 (27.91%)           |
| PlasmaUM686AC_S4        | 856 (44.65%)           |
| UM701-2AC-IDP7_S1       | 623 (32.50%)           |
| PlasmaUM735AC_S3        | 915 (47.73%)           |
| PlasmaUM656B_S4         | 531 (27.70%)           |
| PlasmaUM785B-IDP11_S4   | 575 (29.99%)           |
| PlasmaUM547B_S2         | 487 (25.40%)           |
| UM726B_S2               | 575 (29.99%)           |
| PlasmaUM662B_S4         | 519 (27.07%)           |
| UM774B_S3               | 586 (30.57%)           |
| PlasmaUM635SCC_S3       | 834 (43.51%)           |
| UMs709AC-IDP10_S1       | 562 (29.32%)           |
| PlasmaUM693B_S1         | 851 (44.39%)           |
| VA700B_S1               | 719 (37.51%)           |
| PlasmaUM690B_S2         | 669 (34.90%)           |
| PlasmaUM645B_S1         | 761 (39.70%)           |
| PlasmaUM748AC_S4        | 807 (42.10%)           |
| UM680SCC-IDP01_S1       | 768 (40.06%)           |
| UM751SCC-IDP09_S3       | 682 (35.58%)           |
| PlasmaUM727B_S2         | 863 (45.02%)           |
| PlasmaUM715B-IDP4_S2    | 837 (43.66%)           |
| PlasmaUM719B_S2         | 866 (45.17%)           |
| PlasmaUM777B_S4         | 530 (27.65%)           |
| PlasmaUM708AC_S3        | 893 (46.58%)           |
| UMs757B-IDP5_S2         | 615 (32.08%)           |

|                        |              |
|------------------------|--------------|
| PlasmaUM717AC_S1       | 673 (35.11%) |
| PlasmaUM633B_S3        | 529 (27.60%) |
| PlasmaUM786SCC_S5      | 529 (27.60%) |
| PlasmaUM674AC_S1       | 531 (27.70%) |
| UM759B-IDP12_S2        | 777 (40.53%) |
| PlasmaUM658SCC_S3      | 965 (50.34%) |
| UM741B_S4              | 619 (32.29%) |
| PlasmaUM676B_S3        | 490 (25.56%) |
| PlasmaUM642SCC_S4      | 854 (44.55%) |
| UMs766AC-IDP8_S3       | 570 (29.73%) |
| UMs761SCC-IDP7_S3      | 712 (37.14%) |
| PlasmaUM667SCC_S4      | 876 (45.70%) |
| PlasmaUM373B_S4        | 571 (29.79%) |
| PlasmaUM696SCC-IDP1_S1 | 694 (36.20%) |
| UM760B-IDP02_S1        | 853 (44.50%) |
| PlasmaUM385B_S4        | 659 (34.38%) |
| PlasmaUM641B_S1        | 841 (43.87%) |
| PlasmaUM720SCC_S3      | 809 (42.20%) |
| PlasmaUM730AC_S2       | 953 (49.71%) |
| PlasmaUM737AC_S2       | 915 (47.73%) |
| PlasmaUM734SCC-IDP7_S4 | 565 (29.47%) |
| PlasmaUM644B_S1        | 925 (48.25%) |
| PlasmaUM745SCC-IDP9_S2 | 552 (28.79%) |
| PlasmaUM728SCC-IDP6_S3 | 820 (42.78%) |
| UM740B_S3              | 507 (26.45%) |
| PlasmaUM742B_S2        | 914 (47.68%) |
| PlasmaVA525SCC_S4      | 437 (22.80%) |
| PlasmaVA530SCC_S1      | 486 (25.35%) |
| PlasmaUM659AC_S3       | 864 (45.07%) |
| PlasmaVA473SCC_S1      | 733 (38.24%) |
| PlasmaUM661AC_S4       | 675 (35.21%) |
| PlasmaUM767B_S2        | 422 (22.01%) |

**Supplemental table S4.** Unique search sequences

| Sample name            | Annotated (of total) | Annotated with miRBase | Unannotated (of total) | Total (of total) |
|------------------------|----------------------|------------------------|------------------------|------------------|
| PlasmaVA686B_S1        | 8,091 (4.17%)        | 5,939 (3.06%)          | 186,065 (95.83%)       | 194,156 (100%)   |
| PlasmaUM713B_S2        | 18,986 (3.85%)       | 14,263 (2.90%)         | 473,571 (96.15%)       | 492,557 (100%)   |
| PlasmaVA516SCC_S2      | 18,266 (4.86%)       | 14,356 (3.82%)         | 357,463 (95.14%)       | 375,729 (100%)   |
| UM773AC_S2             | 12,061 (8.39%)       | 9,627 (6.70%)          | 131,627 (91.61%)       | 143,688 (100%)   |
| UM778AC-IDP07_S3       | 8,342 (2.41%)        | 5,867 (1.69%)          | 337,848 (97.59%)       | 346,190 (100%)   |
| PlasmaVA189AC_S1       | 14,591 (13.08%)      | 12,413 (11.13%)        | 96,972 (86.92%)        | 111,563 (100%)   |
| UMs753SCC-IDP3_S1      | 14,453 (2.65%)       | 10,279 (1.89%)         | 530,233 (97.35%)       | 544,686 (100%)   |
| UM754mAC-IDP4_S2       | 9,461 (3.81%)        | 7,274 (2.93%)          | 238,943 (96.19%)       | 248,404 (100%)   |
| PlasmaUM711SCC-IDP2_S1 | 12,683 (9.08%)       | 10,125 (7.25%)         | 127,052 (90.92%)       | 139,735 (100%)   |
| PlasmaUM736AC_S2       | 20,298 (7.52%)       | 15,513 (5.74%)         | 249,776 (92.48%)       | 270,074 (100%)   |
| PlasmaUM692B_S1        | 29,657 (15.02%)      | 24,141 (12.23%)        | 167,732 (84.98%)       | 197,389 (100%)   |
| PlasmaUM636SCC_S4      | 31,530 (15.15%)      | 25,255 (12.13%)        | 176,613 (84.85%)       | 208,143 (100%)   |
| PlasmaUM705mAC_S3      | 12,576 (6.07%)       | 9,382 (4.53%)          | 194,642 (93.93%)       | 207,218 (100%)   |
| PlasmaUM764B-IDP10_S3  | 7,589 (8.65%)        | 6,106 (6.96%)          | 80,144 (91.35%)        | 87,733 (100%)    |
| PlasmaUM652B_S3        | 7,018 (4.79%)        | 4,942 (3.38%)          | 139,353 (95.21%)       | 146,371 (100%)   |
| PlasmaUM686AC_S4       | 24,884 (13.87%)      | 20,872 (11.63%)        | 154,589 (86.13%)       | 179,473 (100%)   |
| UM701-2AC-IDP7_S1      | 10,725 (7.40%)       | 8,648 (5.97%)          | 134,142 (92.60%)       | 144,867 (100%)   |
| PlasmaUM735AC_S3       | 31,180 (7.67%)       | 24,220 (5.96%)         | 375,366 (92.33%)       | 406,546 (100%)   |
| PlasmaUM656B_S4        | 8,198 (2.84%)        | 5,803 (2.01%)          | 280,090 (97.16%)       | 288,288 (100%)   |
| PlasmaUM785B-IDP11_S4  | 8,788 (12.21%)       | 7,343 (10.20%)         | 63,212 (87.79%)        | 72,000 (100%)    |
| PlasmaUM547B_S2        | 7,189 (1.66%)        | 4,686 (1.08%)          | 424,889 (98.34%)       | 432,078 (100%)   |
| UM726B_S2              | 9,745 (3.96%)        | 6,926 (2.81%)          | 236,650 (96.04%)       | 246,395 (100%)   |
| PlasmaUM662B_S4        | 7,527 (3.48%)        | 5,549 (2.57%)          | 208,631 (96.52%)       | 216,158 (100%)   |
| UM774B_S3              | 9,053 (5.75%)        | 7,095 (4.51%)          | 148,278 (94.25%)       | 157,331 (100%)   |
| PlasmaUM635SCC_S3      | 21,759 (8.06%)       | 16,926 (6.27%)         | 248,037 (91.94%)       | 269,796 (100%)   |
| UMs709AC-IDP10_S1      | 8,644 (4.53%)        | 5,923 (3.10%)          | 182,165 (95.47%)       | 190,809 (100%)   |
| PlasmaUM693B_S1        | 26,211 (14.35%)      | 20,913 (11.45%)        | 156,403 (85.65%)       | 182,614 (100%)   |
| VA700B_S1              | 15,996 (4.50%)       | 11,954 (3.36%)         | 339,599 (95.50%)       | 355,595 (100%)   |
| PlasmaUM690B_S2        | 14,978 (7.80%)       | 11,704 (6.10%)         | 176,998 (92.20%)       | 191,976 (100%)   |
| PlasmaUM645B_S1        | 20,351 (9.60%)       | 16,391 (7.73%)         | 191,584 (90.40%)       | 211,935 (100%)   |
| PlasmaUM748AC_S4       | 21,512 (10.28%)      | 17,417 (8.33%)         | 187,659 (89.72%)       | 209,171 (100%)   |
| UM680SCC-IDP01_S1      | 14,743 (3.93%)       | 11,533 (3.08%)         | 360,099 (96.07%)       | 374,842 (100%)   |
| UM751SCC-IDP09_S3      | 12,242 (3.69%)       | 9,342 (2.82%)          | 319,457 (96.31%)       | 331,699 (100%)   |
| PlasmaUM727B_S2        | 27,240 (11.78%)      | 21,196 (9.17%)         | 204,011 (88.22%)       | 231,251 (100%)   |
| PlasmaUM715B-IDP4_S2   | 21,701 (13.89%)      | 17,009 (10.89%)        | 134,504 (86.11%)       | 156,205 (100%)   |
| PlasmaUM719B_S2        | 26,597 (12%)         | 21,112 (9.52%)         | 195,076 (88%)          | 221,673 (100%)   |
| PlasmaUM777B_S4        | 8,337 (3.99%)        | 6,049 (2.89%)          | 200,836 (96.01%)       | 209,173 (100%)   |
| PlasmaUM708AC_S3       | 28,525 (12.30%)      | 22,374 (9.65%)         | 203,325 (87.70%)       | 231,850 (100%)   |

|                        |                 |                 |                  |                |
|------------------------|-----------------|-----------------|------------------|----------------|
| UMs757B-IDP5_S2        | 10,025 (5.49%)  | 7,491 (4.10%)   | 172,542 (94.51%) | 182,567 (100%) |
| PlasmaUM717AC_S1       | 14,628 (3.77%)  | 11,115 (2.86%)  | 373,789 (96.23%) | 388,417 (100%) |
| PlasmaUM633B_S3        | 8,436 (3.10%)   | 5,795 (2.13%)   | 263,462 (96.90%) | 271,898 (100%) |
| PlasmaUM786SCC_S5      | 6,769 (5.91%)   | 5,215 (4.55%)   | 107,764 (94.09%) | 114,533 (100%) |
| PlasmaUM674AC_S1       | 7,847 (8.02%)   | 6,233 (6.37%)   | 89,938 (91.98%)  | 97,785 (100%)  |
| UM759B-IDP12_S2        | 18,284 (4.68%)  | 14,532 (3.72%)  | 372,143 (95.32%) | 390,427 (100%) |
| PlasmaUM658SCC_S3      | 41,392 (18.23%) | 34,590 (15.23%) | 185,710 (81.77%) | 227,102 (100%) |
| UM741B_S4              | 10,946 (4.26%)  | 8,213 (3.20%)   | 246,102 (95.74%) | 257,048 (100%) |
| PlasmaUM676B_S3        | 6,228 (5.82%)   | 4,738 (4.42%)   | 100,857 (94.18%) | 107,085 (100%) |
| PlasmaUM642SCC_S4      | 25,079 (8.73%)  | 19,806 (6.90%)  | 262,045 (91.27%) | 287,124 (100%) |
| UMs766AC-IDP8_S3       | 9,147 (5.07%)   | 6,858 (3.80%)   | 171,135 (94.93%) | 180,282 (100%) |
| UMs761SCC-IDP7_S3      | 15,022 (5.20%)  | 11,065 (3.83%)  | 274,005 (94.80%) | 289,027 (100%) |
| PlasmaUM667SCC_S4      | 31,446 (9.29%)  | 25,026 (7.39%)  | 307,128 (90.71%) | 338,574 (100%) |
| PlasmaUM373B_S4        | 9,307 (8.29%)   | 7,373 (6.57%)   | 102,972 (91.71%) | 112,279 (100%) |
| PlasmaUM696SCC-IDP1_S1 | 13,459 (9.38%)  | 10,763 (7.50%)  | 130,050 (90.62%) | 143,509 (100%) |
| UM760B-IDP02_S1        | 22,430 (7.19%)  | 18,575 (5.96%)  | 289,375 (92.81%) | 311,805 (100%) |
| PlasmaUM385B_S4        | 11,840 (11.34%) | 9,654 (9.24%)   | 92,605 (88.66%)  | 104,445 (100%) |
| PlasmaUM641B_S1        | 25,667 (14.52%) | 21,383 (12.10%) | 151,114 (85.48%) | 176,781 (100%) |
| PlasmaUM720SCC_S3      | 23,855 (12.47%) | 19,148 (10.01%) | 167,388 (87.53%) | 191,243 (100%) |
| PlasmaUM730AC_S2       | 35,955 (13.62%) | 29,832 (11.30%) | 228,110 (86.38%) | 264,065 (100%) |
| PlasmaUM737AC_S2       | 29,666 (10.13%) | 23,753 (8.11%)  | 263,130 (89.87%) | 292,796 (100%) |
| PlasmaUM734SCC-IDP7_S4 | 8,295 (6.15%)   | 6,470 (4.80%)   | 126,478 (93.85%) | 134,773 (100%) |
| PlasmaUM644B_S1        | 38,344 (20.98%) | 32,269 (17.65%) | 144,442 (79.02%) | 182,786 (100%) |
| PlasmaUM745SCC-IDP9_S2 | 8,936 (5.92%)   | 6,687 (4.43%)   | 142,016 (94.08%) | 150,952 (100%) |
| PlasmaUM728SCC-IDP6_S3 | 20,678 (15.45%) | 17,154 (12.82%) | 113,136 (84.55%) | 133,814 (100%) |
| UM740B_S3              | 7,653 (2.96%)   | 5,649 (2.18%)   | 250,906 (97.04%) | 258,559 (100%) |
| PlasmaUM742B_S2        | 29,890 (14.74%) | 24,527 (12.10%) | 172,848 (85.26%) | 202,738 (100%) |
| PlasmaVA525SCC_S4      | 6,193 (2.02%)   | 4,111 (1.34%)   | 301,013 (97.98%) | 307,206 (100%) |
| PlasmaVA530SCC_S1      | 6,126 (2.01%)   | 4,281 (1.41%)   | 298,565 (97.99%) | 304,691 (100%) |
| PlasmaUM659AC_S3       | 24,999 (17.49%) | 20,872 (14.60%) | 117,913 (82.51%) | 142,912 (100%) |
| PlasmaVA473SCC_S1      | 17,418 (4.36%)  | 13,205 (3.30%)  | 382,135 (95.64%) | 399,553 (100%) |
| PlasmaUM661AC_S4       | 15,760 (7.36%)  | 11,586 (5.41%)  | 198,401 (92.64%) | 214,161 (100%) |
| PlasmaUM767B_S2        | 4,993 (4.48%)   | 3,727 (3.35%)   | 106,421 (95.52%) | 111,414 (100%) |



**Supplemental table S5.** The number of reads annotated with miRBase

| Sample name            | Annotated          | Annotated          | Unannotated        | Total            |
|------------------------|--------------------|--------------------|--------------------|------------------|
| PlasmaVA686B_S1        | 463,565 (57.43%)   | 443,073 (54.89%)   | 343,666 (42.57%)   | 807,231 (100%)   |
| PlasmaUM713B_S2        | 1,118,115 (49.83%) | 1,030,540 (45.93%) | 1,125,632 (50.17%) | 2,243,747 (100%) |
| PlasmaVA516SCC_S2      | 1,067,977 (52.16%) | 1,014,378 (49.55%) | 979,388 (47.84%)   | 2,047,365 (100%) |
| UM773AC_S2             | 630,609 (70.48%)   | 598,516 (66.89%)   | 264,120 (29.52%)   | 894,729 (100%)   |
| UM778AC-IDP07_S3       | 396,702 (42.25%)   | 387,834 (41.31%)   | 542,222 (57.75%)   | 938,924 (100%)   |
| PlasmaVA189AC_S1       | 967,397 (80.01%)   | 943,687 (78.04%)   | 241,766 (19.99%)   | 1,209,163 (100%) |
| UMs753SCC-IDP3_S1      | 819,905 (49.04%)   | 795,055 (47.56%)   | 851,905 (50.96%)   | 1,671,810 (100%) |
| UM754mAC-IDP4_S2       | 604,062 (60.17%)   | 591,766 (58.95%)   | 399,813 (39.83%)   | 1,003,875 (100%) |
| PlasmaUM711SCC-IDP2_S1 | 661,426 (72.73%)   | 603,620 (66.38%)   | 247,954 (27.27%)   | 909,380 (100%)   |
| PlasmaUM736AC_S2       | 1,148,819 (72.80%) | 949,779 (60.19%)   | 429,270 (27.20%)   | 1,578,089 (100%) |
| PlasmaUM692B_S1        | 2,075,713 (85.50%) | 1,895,158 (78.06%) | 352,030 (14.50%)   | 2,427,743 (100%) |
| PlasmaUM636SCC_S4      | 2,870,619 (87.69%) | 2,630,572 (80.36%) | 403,006 (12.31%)   | 3,273,625 (100%) |
| PlasmaUM705mAC_S3      | 679,258 (62.86%)   | 629,270 (58.24%)   | 401,288 (37.14%)   | 1,080,546 (100%) |
| PlasmaUM764B-IDP10_S3  | 477,496 (76.58%)   | 467,585 (74.99%)   | 145,993 (23.42%)   | 623,489 (100%)   |
| PlasmaUM652B_S3        | 205,973 (47.38%)   | 183,607 (42.23%)   | 228,777 (52.62%)   | 434,750 (100%)   |
| PlasmaUM686AC_S4       | 2,218,644 (88.75%) | 2,082,164 (83.29%) | 281,270 (11.25%)   | 2,499,914 (100%) |
| UM701-2AC-IDP7_S1      | 551,080 (67.29%)   | 538,818 (65.80%)   | 267,826 (32.71%)   | 818,906 (100%)   |
| PlasmaUM735AC_S3       | 2,230,443 (76.27%) | 1,969,870 (67.36%) | 693,791 (23.73%)   | 2,924,234 (100%) |
| PlasmaUM656B_S4        | 397,266 (46.39%)   | 379,001 (44.25%)   | 459,155 (53.61%)   | 856,421 (100%)   |
| PlasmaUM785B-IDP11_S4  | 454,804 (78.11%)   | 435,954 (74.87%)   | 127,455 (21.89%)   | 582,259 (100%)   |
| PlasmaUM547B_S2        | 209,372 (19.15%)   | 195,717 (17.90%)   | 883,864 (80.85%)   | 1,093,236 (100%) |
| UM726B_S2              | 455,967 (53.13%)   | 430,805 (50.20%)   | 402,252 (46.87%)   | 858,219 (100%)   |
| PlasmaUM662B_S4        | 387,393 (53.50%)   | 373,376 (51.56%)   | 336,697 (46.50%)   | 724,090 (100%)   |
| UM774B_S3              | 627,317 (69.54%)   | 611,067 (67.74%)   | 274,762 (30.46%)   | 902,079 (100%)   |
| PlasmaUM635SCC_S3      | 1,445,462 (76.62%) | 1,333,649 (70.70%) | 441,013 (23.38%)   | 1,886,475 (100%) |
| UMs709AC-IDP10_S1      | 338,827 (49.39%)   | 320,520 (46.72%)   | 347,252 (50.61%)   | 686,079 (100%)   |
| PlasmaUM693B_S1        | 2,437,623 (87.69%) | 2,085,236 (75.02%) | 342,091 (12.31%)   | 2,779,714 (100%) |
| VA700B_S1              | 844,274 (61.31%)   | 731,733 (53.14%)   | 532,767 (38.69%)   | 1,377,041 (100%) |
| PlasmaUM690B_S2        | 1,220,428 (78.01%) | 1,158,474 (74.05%) | 343,932 (21.99%)   | 1,564,360 (100%) |
| PlasmaUM645B_S1        | 1,456,638 (81.31%) | 1,283,514 (71.64%) | 334,912 (18.69%)   | 1,791,550 (100%) |
| PlasmaUM748AC_S4       | 1,982,709 (86.18%) | 1,855,694 (80.66%) | 317,922 (13.82%)   | 2,300,631 (100%) |
| UM680SCC-IDP01_S1      | 805,107 (56.85%)   | 766,096 (54.09%)   | 611,134 (43.15%)   | 1,416,241 (100%) |
| UM751SCC-IDP09_S3      | 903,036 (63%)      | 868,586 (60.60%)   | 530,332 (37%)      | 1,433,368 (100%) |
| PlasmaUM727B_S2        | 2,391,856 (84.03%) | 1,985,762 (69.76%) | 454,609 (15.97%)   | 2,846,465 (100%) |
| PlasmaUM715B-IDP4_S2   | 1,771,627 (83.18%) | 1,579,302 (74.15%) | 358,316 (16.82%)   | 2,129,943 (100%) |
| PlasmaUM719B_S2        | 2,019,080 (83.18%) | 1,678,275 (69.14%) | 408,372 (16.82%)   | 2,427,452 (100%) |
| PlasmaUM777B_S4        | 691,396 (65.76%)   | 681,075 (64.78%)   | 359,964 (34.24%)   | 1,051,360 (100%) |

|                        |                    |                    |                  |                  |
|------------------------|--------------------|--------------------|------------------|------------------|
| PlasmaUM708AC_S3       | 2,223,966 (84.21%) | 1,655,873 (62.70%) | 416,970 (15.79%) | 2,640,936 (100%) |
| UMs757B-IDP5_S2        | 649,742 (66.41%)   | 618,494 (63.22%)   | 328,566 (33.59%) | 978,308 (100%)   |
| PlasmaUM717AC_S1       | 1,107,019 (62.55%) | 1,083,231 (61.20%) | 662,831 (37.45%) | 1,769,850 (100%) |
| PlasmaUM633B_S3        | 458,808 (52.02%)   | 444,119 (50.36%)   | 423,167 (47.98%) | 881,975 (100%)   |
| PlasmaUM786SCC_S5      | 396,702 (64.40%)   | 386,713 (62.77%)   | 219,330 (35.60%) | 616,032 (100%)   |
| PlasmaUM674AC_S1       | 478,917 (71.76%)   | 466,721 (69.93%)   | 188,447 (28.24%) | 667,364 (100%)   |
| UM759B-IDP12_S2        | 1,421,543 (68.97%) | 1,390,874 (67.48%) | 639,503 (31.03%) | 2,061,046 (100%) |
| PlasmaUM658SCC_S3      | 4,713,021 (91.66%) | 4,145,097 (80.61%) | 428,847 (8.34%)  | 5,141,868 (100%) |
| UM741B_S4              | 688,693 (61.27%)   | 656,539 (58.41%)   | 435,292 (38.73%) | 1,123,985 (100%) |
| PlasmaUM676B_S3        | 469,791 (69.28%)   | 462,424 (68.20%)   | 208,271 (30.72%) | 678,062 (100%)   |
| PlasmaUM642SCC_S4      | 1,952,169 (80.24%) | 1,638,716 (67.36%) | 480,624 (19.76%) | 2,432,793 (100%) |
| UMs766AC-IDP8_S3       | 620,515 (65.92%)   | 595,086 (63.22%)   | 320,790 (34.08%) | 941,305 (100%)   |
| UMs761SCC-IDP7_S3      | 932,185 (64.49%)   | 822,003 (56.87%)   | 513,286 (35.51%) | 1,445,471 (100%) |
| PlasmaUM667SCC_S4      | 2,108,957 (77.86%) | 1,828,245 (67.50%) | 599,618 (22.14%) | 2,708,575 (100%) |
| PlasmaUM373B_S4        | 677,735 (72.80%)   | 664,368 (71.36%)   | 253,209 (27.20%) | 930,944 (100%)   |
| PlasmaUM696SCC-IDP1_S1 | 773,325 (76.84%)   | 710,985 (70.64%)   | 233,147 (23.16%) | 1,006,472 (100%) |
| UM760B-IDP02_S1        | 2,122,653 (81.20%) | 2,071,001 (79.23%) | 491,320 (18.80%) | 2,613,973 (100%) |
| PlasmaUM385B_S4        | 920,039 (80.67%)   | 891,634 (78.18%)   | 220,415 (19.33%) | 1,140,454 (100%) |
| PlasmaUM641B_S1        | 2,739,038 (90.82%) | 2,593,720 (86.01%) | 276,709 (9.18%)  | 3,015,747 (100%) |
| PlasmaUM720SCC_S3      | 1,590,274 (82.39%) | 1,290,894 (66.88%) | 339,835 (17.61%) | 1,930,109 (100%) |
| PlasmaUM730AC_S2       | 3,004,193 (86.79%) | 2,628,896 (75.95%) | 457,351 (13.21%) | 3,461,544 (100%) |
| PlasmaUM737AC_S2       | 2,553,435 (80.12%) | 2,410,971 (75.65%) | 633,503 (19.88%) | 3,186,938 (100%) |
| PlasmaUM734SCC-IDP7_S4 | 430,365 (65.97%)   | 409,768 (62.81%)   | 222,041 (34.03%) | 652,406 (100%)   |
| PlasmaUM644B_S1        | 3,264,500 (90.05%) | 2,881,601 (79.49%) | 360,573 (9.95%)  | 3,625,073 (100%) |
| PlasmaUM745SCC-IDP9_S2 | 506,134 (67.75%)   | 490,949 (65.72%)   | 240,915 (32.25%) | 747,049 (100%)   |
| PlasmaUM728SCC-IDP6_S3 | 2,077,180 (89.28%) | 1,976,822 (84.97%) | 249,332 (10.72%) | 2,326,512 (100%) |
| UM740B_S3              | 547,615 (56.89%)   | 536,532 (55.73%)   | 415,055 (43.11%) | 962,670 (100%)   |
| PlasmaUM742B_S2        | 2,890,938 (89.21%) | 2,488,589 (76.79%) | 349,710 (10.79%) | 3,240,648 (100%) |
| PlasmaVA525SCC_S4      | 223,683 (30.37%)   | 215,010 (29.19%)   | 512,834 (69.63%) | 736,517 (100%)   |
| PlasmaVA530SCC_S1      | 217,405 (28.54%)   | 210,569 (27.64%)   | 544,467 (71.46%) | 761,872 (100%)   |
| PlasmaUM659AC_S3       | 2,694,674 (91.24%) | 2,522,405 (85.40%) | 258,822 (8.76%)  | 2,953,496 (100%) |
| PlasmaVA473SCC_S1      | 827,024 (45.55%)   | 762,215 (41.98%)   | 988,615 (54.45%) | 1,815,639 (100%) |
| PlasmaUM661AC_S4       | 780,368 (68.03%)   | 653,157 (56.94%)   | 366,648 (31.97%) | 1,147,016 (100%) |
| PlasmaUM767B_S2        | 217,837 (50.30%)   | 212,486 (49.07%)   | 215,200 (49.70%) | 433,037 (100%)   |

**Supplementary Table S6.** miRNAs associated with age, race, gender, and smoking status using ANOVA test

| miRNAs      | Variables | p-value |
|-------------|-----------|---------|
| miR-200a-3p | Age       | <0.0001 |
| miR-1299    | Gender    | 0.0492  |
| miR-215-5p  | Gender    | 0.0368  |
| miR-1299    | Race      | 0.048   |
| miR-215-5p  | Race      | 0.0045  |
| miR-200a-3p | Race      | <0.0001 |
| miR-215-5p  | Smoking   | 0.0133  |
| miR-205-5p  | Stages    | 0.0028  |

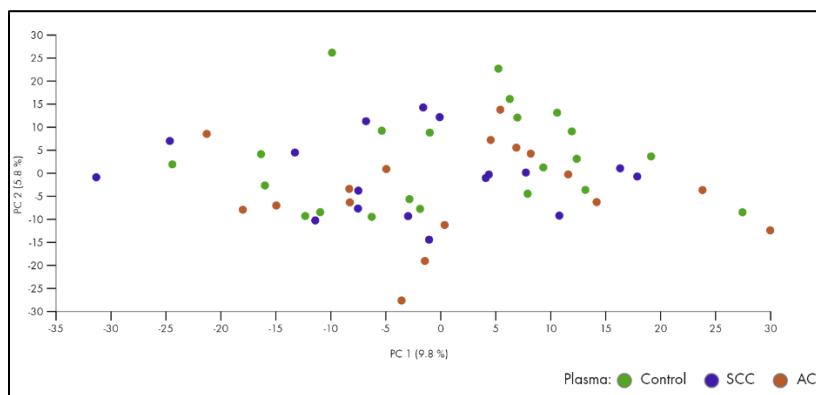

**Supplemental Figure S1.** Assessing inter- and intragroup variability among AC, SCC, and control samples by PCA plot. Principal components 1 and 2 for variance in miRNA expression in AC, SCC and control were displayed.

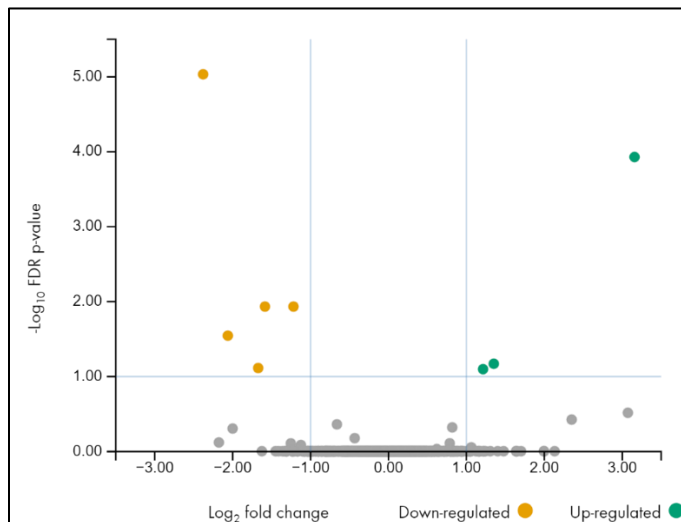

**Supplemental Figure S2.** Volcano plots of differentially expressed genes between NSCLC and non-cancer control. Up or down regulated miRNA were either in green or orange. The cutoff values were fold change greater than 2, p-value<0.05 and an FDR p-value ≤0.1.

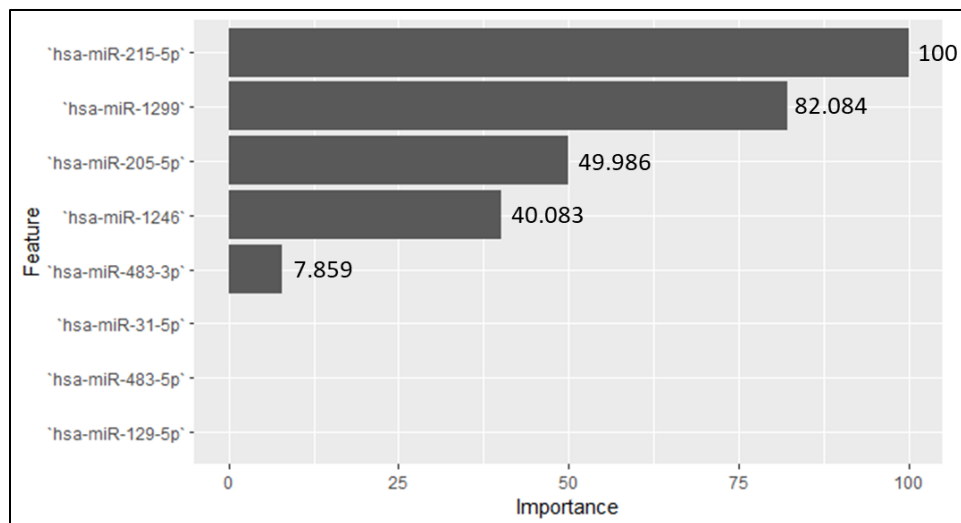

**Supplemental Figure S3** The important of individual DE miRNAs in the diagnosis of NSCLC over non-cancer control. A combination of 5 miRNAs as diagnostic biomarkers of NSCLC over non-cancer control were identified by LASSO methods.

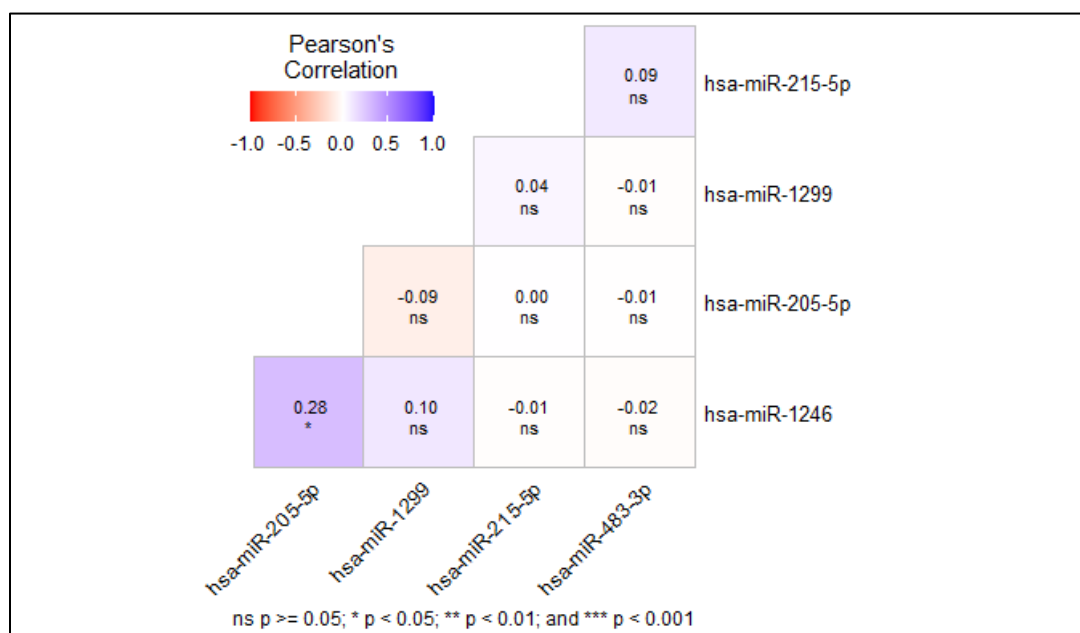

**Supplemental Figure S4.** No collinearity was observed among the 5 DE miRNAs between NSCLC and non-cancer control. Pearson correlation of the 5 miRNAs were examined using R studio.

**Supplemental table S7.** Pearson's correlation analysis of the 5 DE miRNAs identified by LASSO regression between NSCLC and non-cancer control.

|                | has-miR-1246 |        | has-miR-1299 |       | has-miR-205-5p |        | has-miR-215-5p |       | hsa-miR-483-3p |       |
|----------------|--------------|--------|--------------|-------|----------------|--------|----------------|-------|----------------|-------|
|                | CC *         | p      | CC           | p     | CC             | p      | CC             | p     | CC             | p     |
| has-miR-1246   | 1            | 0.000  | 0.10188      | 0.398 | 0.28369        | 0.0165 | -0.01016       | 0.933 | -0.01793       | 0.882 |
| has-miR-1299   | 0.1019       | 0.3979 | 1            | 0.000 | -0.08554       | 0.4781 | 0.04065        | 0.736 | -0.00959       | 0.937 |
| has-miR-205-5p | 0.2837       | 0.0165 | -0.08554     | 0.478 | 1              | 0.000  | 0.00372        | 0.975 | -0.00558       | 0.963 |
| has-miR-215-5p | -0.0102      | 0.9330 | 0.04065      | 0.736 | 0.00372        | 0.9754 | 1              | 0.000 | 0.09353        | 0.438 |
| hsa-miR-483-3p | -0.0179      | 0.8820 | -0.00959     | 0.937 | -0.00558       | 0.9631 | 0.09353        | 0.438 | 1              | 0.000 |

\* CC: correlation coefficient. *p*-values <0.05 was considered statistically significant.

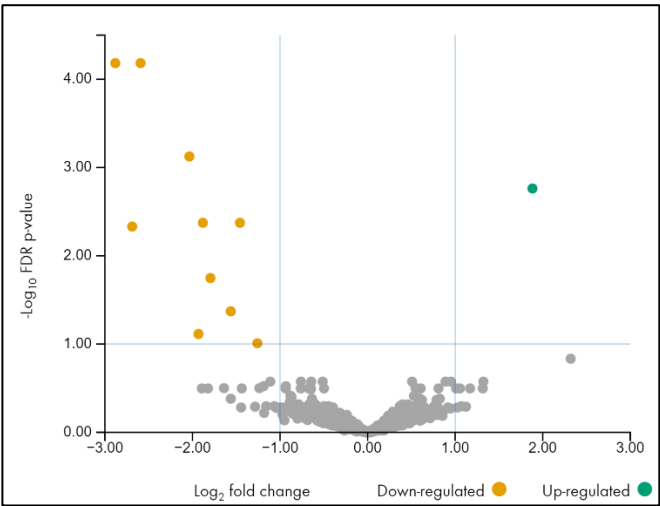

**Supplemental Figure S5.** Volcano plots of differentially expressed genes between SCC and non-cancer control. Up or down regulated miRNA were either in green or orange. The cutoff values were fold change greater than 2, *p*-value<0.05 and an FDR *p*-value ≤0.1.

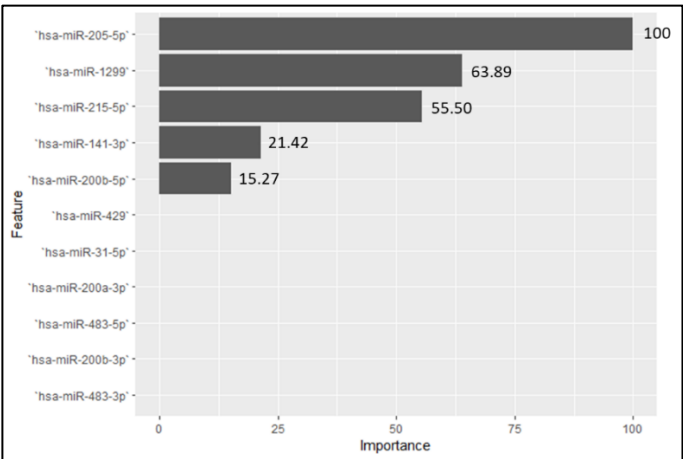

**Supplemental Figure S6.** Individual DE miRNAs in the diagnosis of SCC over non-cancer control. A combination of 5 miRNAs as diagnostic biomarkers of SCC over non-cancer control were identified by LASSO methods.

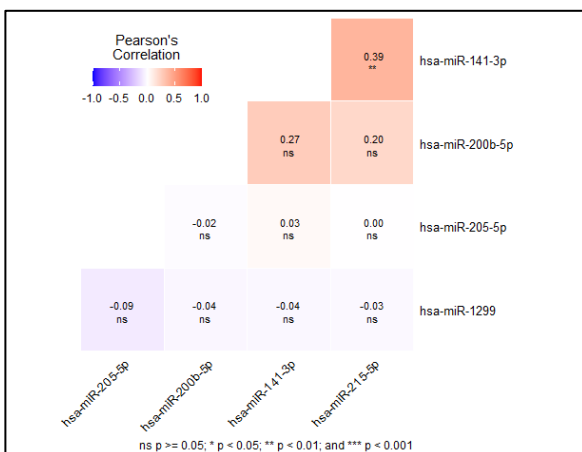

**Supplemental Figure S7** No collinearity was observed among the 5 miRNAs. Pearson correlation of the 5 miRNAs were examined using R studio.

**Supplemental table S8.** Pearson's correlation analysis of the 5 DE miRNAs identified between SCC and control by LASSO regression.

|                 | has-miR-1299 |          | has-miR-141-3p |          | has-miR-200b-5p |          | has-miR-205-5p |          | has-miR-215-5p |          |
|-----------------|--------------|----------|----------------|----------|-----------------|----------|----------------|----------|----------------|----------|
|                 | CC *         | <i>p</i> | CC             | <i>p</i> | CC              | <i>p</i> | CC             | <i>p</i> | CC             | <i>p</i> |
| has_miR_1299    | 1            | 0        | 0.0352         | 0.80408  | 0.0387          | 0.7856   | 0.08785        | 0.536    | 0.02756        | 0.84624  |
| has_miR_141_3p  | -            | -        | 1              | 0        | 0.2660          | 0.0566   | 0.02992        | 0.833    | 0.38596        | 0.00471  |
| has_miR_200b_5p | -            | -        | 0.0387         | 0.786    | 1               | 0        | 0.01674        | 0.906    | 0.20442        | 0.14604  |
| has_miR_205_5p  | -            | -        | 0.0878         | 0.536    | 0.0299          | 0.83321  | 1              | 0        | 0.00297        | 0.98333  |
| has_miR_215_5p  | -            | -        | 0.0276         | 0.846    | 0.3860          | 0.00471  | 0.2044         | 0.1460   | 1              | 0        |

\* CC: correlation coefficient. *p*-values  $< 0.05$  was considered statistically significant.

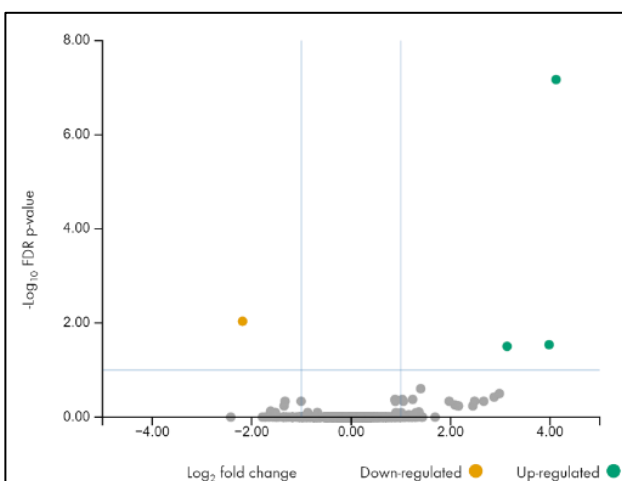

**Supplemental Figure S8.** Volcano plots showed four DE miRNAs between AC and non-cancer control plasma samples identified by Geneglobe RNAseq Analysis Portal. Up- and downregulated miRNAs are shown in either green or yellow. Cutoff values were an absolute value of fold change  $\geq 2$ , an FDR *p*-value  $\leq 0.1$  and a *p*-value  $< 0.5$

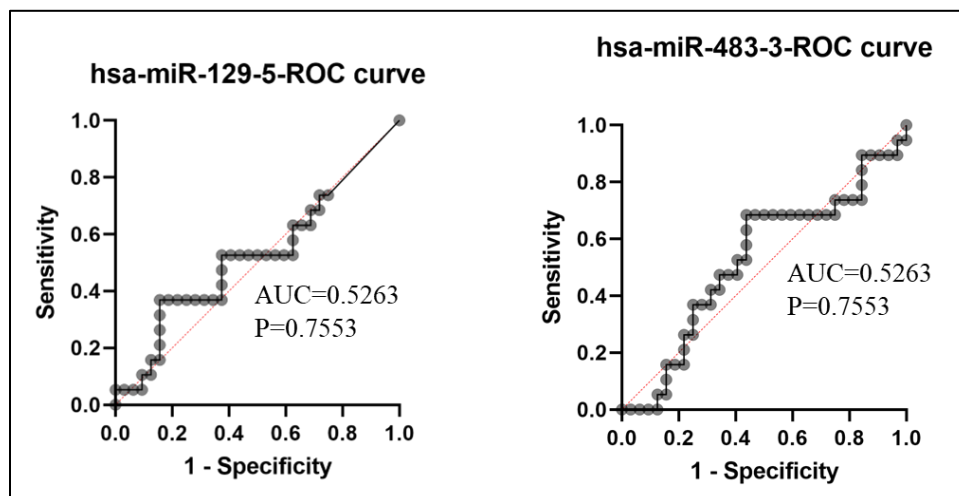

**Supplemental Figure S9.** Simple logistic regression and ROC curve analysis of the diagnostic power of individual DE miRNAs in discriminating AC from non-cancer control. The correlation of sensitivity and specificity of each DE miRNA was presented along with the Area under the curve (AUC) and p-value. Analysis and graph made by Prism Graphpad.

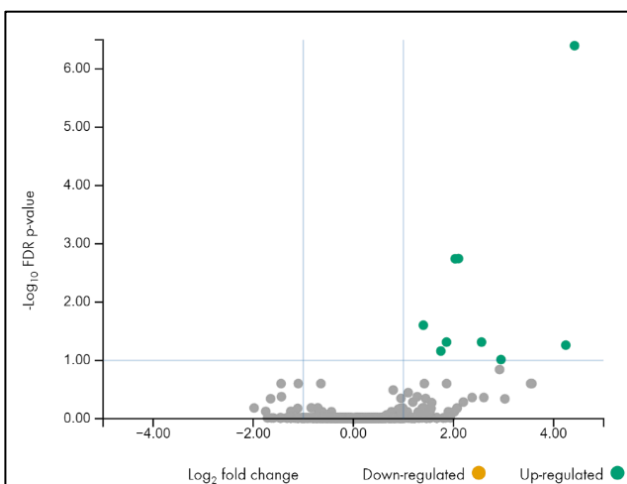

**Supplemental Figure S10.** A volcano plot illustrated DE miRNAs between AC vs. SCC identified by Geneglobe. Up and downregulated miRNAs are shown in either green or yellow. Each data point represents a plasma sample. Cutoff values were an absolute value of fold change  $\geq 2$ , an FDR p-value  $\leq 0.1$  and a p-value  $< 0.5$ .

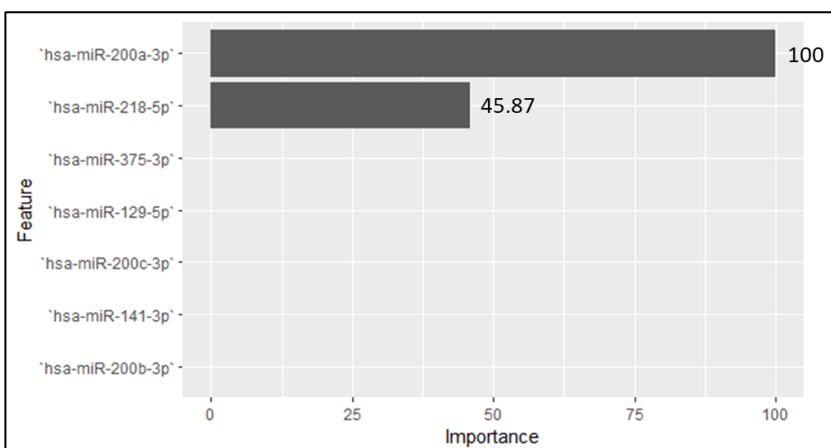

**Supplemental Figure S11.** The important of individual DE miRNAs in the diagnosis of AC over SCC. A combination of 2 miRNAs as diagnostic biomarkers of AC from SCC were identified by LASSO analysis.

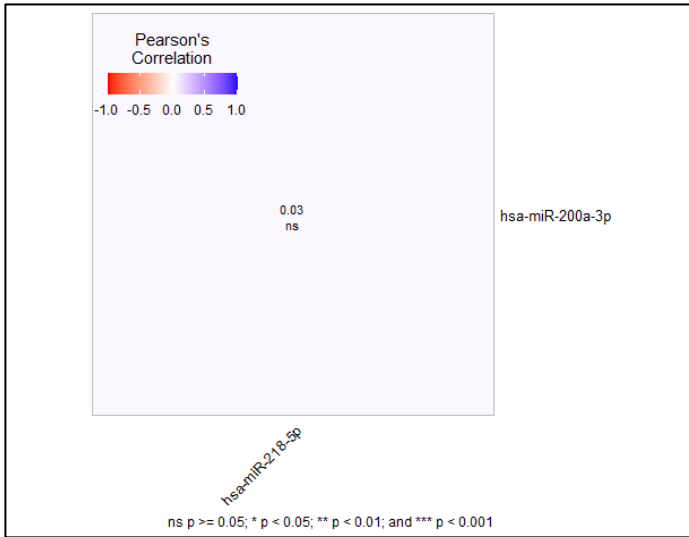

**Supplemental Figure S12.** No collinearity was observed among the 5 miRNAs. Pearson correlation of the 5 miRNAs were examined using R studio.

**Supplemental table S9.** Pearson's correlation analysis of the 2 DE miRNAs identified between AC and SCC by LASSO regression.

|                 | hsa-miR-200a-3p |          | hsa-miR-218-5p |          |
|-----------------|-----------------|----------|----------------|----------|
|                 | CC*             | <i>p</i> | CC             | <i>p</i> |
| hsa-miR-200a-3p | 1.0000          | 0.000    | 0.0336         | 0.839    |
| hsa-miR-218-5p  | 0.0336          | 0.839    | 1.0000         | 0.000    |

\* CC: correlation coefficient. *p*-values <0.05 was considered statistically significant.
